# Supplementary material for: Assessing Proteinase K Resistance of Fish Prion Proteins in a Scrapie-Infected Mouse Neuroblastoma Cell Line
Source: Viruses. 2014 Nov 13;6(11):4398–421. doi: 10.3390/v6114398 (PMC4246229; doi:10.3390/v6114398)
Supplement: Supplementary File 2 [file viruses-06-04398-s002.txt]

Supplementary Material

Assessing Proteinase K Resistance of Fish Prion Proteins in a Scrapie-Infected Mouse Neuroblastoma Cell Line

Evgenia Salta, Eirini Kanata, Christos A. Ouzounis, Sabine Gilch, Hermann Schätzl and Theodoros Sklaviadis

Supplementary 2. Fasta format of the 58 non-mammalian PrP sequences, including fish, amphibians, reptiles and birds, derived from PSI-BLAST analysis as discussed in the text.
                     
                     
                     >1U5L_:_Trachemys_scripta_:::_108_:::_???_:::_amphibian/1-108
                     ........................................................................
                     ........................................................................
                     ........................................................................
                     ........................................................................
                     ........................................................................
                     .....................................................G..................
                     ...SVVGGLGGYALGSAMS...................GMRMNFDRPEERQWWNENSNRYPNQVYYKEYNDR
                     .SVPEGRFVRDCVNITVTEYKIDPNE...........NQNVTQVEV...RVMKQVIQEMCMQQYQQYQLA..
                     ..SG....................................................................
                     ........................................................................
                     ........................................................................
                     ...............................................................
                     >1U3M_:_Gallus_gallus_:::_117_:::_???_:::_bird/1-117
                     ........................................................................
                     ........................................................................
                     ........................................................................
                     ........................................................................
                     ........................................................................
                     .....................................................G..................
                     ...SVVGGLGGYAMGRVMS...................GMNYHFDRPDEYRWWSENSARYPNRVYYRDYSS.
                     .PVPQDVFVADCFNITVTEYSIGPAAKKNTSEAVAAANQTEVEMEN...KVVTKVIREMCVQQYREYRLA..
                     ..S.....................................................................
                     ........................................................................
                     ........................................................................
                     ...............................................................
                     >29467230_:_Pelodiscus_sinensis_:::_266_:::_???_:::_reptile/1-266
                     ........................................................................
                     ........................................................................
                     ............................................MGRHLISCWIIVLFVAMW..SDVSLAKK
                     GKGKTGGGGWNT..........................GSN..........RNP...............SNP
                     .........GY......PSNPGYPRNPSYPHNPGYPNNPAYPPNPSYPRNPS.YPQNPGYP...NNPGV...
                     GGQ.PYY........PPGGGTDFKNQKGWKPAKPKT......NLKAVAGAAAAG..................
                     ...AVVGGIGGIALGSAMS...................GMRMNFDRPDESRWWNENQNRYPNQVYYREYGDR
                     .SVPRGTFVNDCVNITVTEYKIDPKE...........NQNVTEIEV...KVLKRVIQEMCMQQYQKYQLA..
                     ..SGVKLLLCDPLLMLMIMLV..FFLVMR...........................................
                     ........................................................................
                     ........................................................................
                     ...............................................................
                     >294991852_:_Gallus_gallus_:::_273_:::_???_:::_bird/1-273
                     ........................................................................
                     ........................................................................
                     ............................................MARLLTTCCLLALLLAAC..TDVALSKK
                     GKGKPSGGGWGA..........................GSH..........RQPS............YPRQP
                     .........GY......PHNPGYPHNPGYPHN......PGYPHNPGYPHNPG.YPQNPGYP...HNPGYPG.
                     WGQ.GYN........PSSGG.SYHNQKPWKPHK..T......NFKHVAGAAAAG..................
                     ...AVVGGLGGYAMGRVMS...................GMNYHFDSPDEYRWWSENSARYPNRVYYRDY.SS
                     .PVPQDVFVADCFNITVTEYSIGPAAKKNTSEAVAAANQTEVEMEN...KVVTKVIREMCVQQYREYRLA..
                     ..SGIQLH.PADTWLAVLLLLLTTLFAMH...........................................
                     ........................................................................
                     ........................................................................
                     ...............................................................
                     >400846_:_Gallus_gallus_:::_273_:::_???_:::_bird/1-273
                     ........................................................................
                     ........................................................................
                     ............................................MARLLTTCCLLALLLAAC..TDVALSKK
                     GKGKPSGGGWGA..........................GSH..........RQPS............YPRQP
                     .........GY......PHNPGYPHNPGYPHN......PGYPHNPGYPHNPG.YPQNPGYP...HNPGYPG.
                     WGQ.GYN........PSSGG.SYHNQKPWKPPK..T......NFKHVAGAAAAG..................
                     ...AVVGGLGGYAMGRVMS...................GMNYHFDSPDEYRWWSENSARYPNRVYYRDY.SS
                     .PVPQDVFVADCFNITVTEYSIGPAAKKNTSEAVAAANQTEVEMEN...KVVTKVIREMCVQQYREYRLA..
                     ..SGIQLH.PADTWLAVLLLLLTTLFAMH...........................................
                     ........................................................................
                     ........................................................................
                     ...............................................................
                     >45382625_:_Gallus_gallus_:::_267_:::_???_:::_bird/1-267
                     ........................................................................
                     ........................................................................
                     ............................................MARLLTTCCLLALLLAAC..TDVALSKK

                     GKGKPSGGGWGA..........................GSH..........RQPS............YPRQP
                     .........GY......PHNPGYPHNPGYPHN......PGYPHNPGYP.......QNPGYP...HNPGYPG.
                     WGQ.GYN........PSSGG.SYHNQKPWKPPK..T......NFKHVAGAAAAG..................
                     ...AVVGGLGGYAMGRVMS...................GMNYHFDRPDEYRWWSENSARYPNRVYYRDY.SS
                     .PVPQDVFVADCFNITVTEYSIGPAAKKNTSEAVAAANQTEVEMEN...KVVTKVIREMCVQQYREYRLA..
                     ..SGIQLH.PADTWLAVLLLLLTTLFAMH...........................................
                     ........................................................................
                     ........................................................................
                     ...............................................................
                     >38489076_:_Pavo_muticus_:::_266_:::_???_:::_bird/1-266
                     ........................................................................
                     ........................................................................
                     ............................................MARLLTTCCLLALLLAAC..TDVALSKK
                     GKGKPGGGGWGG..........................GSH..........RQPS............YPRQP
                     .........GY......PHNPGYPHNPGYPHN......PGYPHNPGYP.......QNPGYP...HNPGYPG.
                     WGQ.GYN........PSSGG.SYHNQKPWKPPK..T......NFKHVAGAAAAG..................
                     ...AVVGGLGGYALGRAMS...................GMSYHFDSPDEYRWWNENSARYPNRVYYRDY.SS
                     .PVSQDVFVADCFNITVTEYSIGPAAKKNTSEAAPAANQTDVEMEN...KVVTKVIREMCVQQYREYRLA..
                     ..SGIQLH.PADTWLAVLLLL.ATLFAMH...........................................
                     ........................................................................
                     ........................................................................
                     ...............................................................
                     >38489078_:_Melopsittacus_undulatus_:::_273_:::_???_:::_bird/1-273
                     ........................................................................
                     ........................................................................
                     ............................................MARLLTTCCLLALLLAAC..TDVALSKK
                     GKGKPSGGGWGA..........................GSH..........RQPS............YPRQP
                     .........GY......PHNPGYPHNPGYPHN......PGYPHNPGHPHNPG.YPQNPGYP...HNPGYPG.
                     WGQ.GYN........PSSGG.SYHNQKPWKPPK..T......NFKHVAGAAAAG..................
                     ...AVVGGLGGYAMGRVMS...................GMNYHFDSPDEYRWWSENSARYPNRVYYRDY.SS
                     .PVPQGVFVADCFNITVTEYSIGPAAKKNTSEAVAAANQTEVEMEN...KVVTKVIREMCVQQYREYRLA..
                     ..SGIQLH.PADTWLAVLLLLLTTLFAMH...........................................
                     ........................................................................
                     ........................................................................
                     ...............................................................
                     >8132979_:_Coturnix_coturnix_:::_266_:::_???_:::_bird/1-266
                     ........................................................................
                     ........................................................................
                     ............................................MARLLTTCCLLALLLAAC..TDVALSKK
                     GKGKPSGGGWGA..........................GSH..........RQPS............YPRQP
                     .........GY......PHNPGYPHNPGYPHN......PGYPHNPGYP.......QNPGYP...HNPGYPG.
                     WGQ.GYN........PSSGG.SYHNQKPWKPPK..T......NFKHVAGAAAAG..................
                     ...AVVGGLGGYAMGRVMS...................GMSYRFDSPDEYRWWNENSARYPNRVYYRDY.SS
                     .PVSQDVFVADCFNITVTEYSIGPAAKKNTSEAVPAANQTDVEMEN...KVVTKVIREMCVQQYREYRLA..
                     ..SGIQLH.PADTWLAVLLLL.TTLFAMH...........................................
                     ........................................................................
                     ........................................................................
                     ...............................................................
                     >8132977_Columba_rupestris_:::_266_:::_???_:::_bird/1-266
                     ........................................................................
                     ........................................................................
                     ............................................MARLLTTCCLLALLLAAC..TDVALSKK
                     GKGKPSGGGWGA..........................GSH..........RQPN............YPRQP
                     .........GY......PHNPGYPHNPGYPHN......PGYPHNPGYP.......QNPGYP...HNPGYPG.
                     WGQ.GYN........PSSGG.SYHNQKPWKPPK..T......NFKHVAGAAAAG..................
                     ...AVVGGLGGYAMGRVMS...................GMSYRFDSPDEYRWWNENSARYPNRVYYRDY.SS
                     .PVSQDVFVADCFNITVTEYSIGPAARKNTSEAVPAANQTDVEMEN...KVVTKVIREMCVQQYREYRLA..
                     ..SGIQLH.PADTWLAVLLLL.TTLFAMH...........................................
                     ........................................................................
                     ........................................................................
                     ...............................................................
                     >224080764_:_Taeniopygia_guttata_:::_269_:::_???_:::_bird/1-269
                     ........................................................................
                     ........................................................................
                     ............................................MAKLPGTSCLLLLLLLLLLGADLASCKK
                     GKGKPGGGGWGT..........................GS...........RQPS............YPRQP
                     .........GY......PQNPGYPHNPGYPHN......PGYPHNPGYPHNPG.YPHNPGYP.........G.
                     WNQ.GYN........PSSGG.NYH.QKPWKAPKPKT......NLKHVAGAAAAG..................
                     ...AVVGGLGGYAMGRVMS...................GMQYRFDSPDEYRWWSENAARYPNQVYYRDYRGG
                     .AVPQDVFVADCFNITVTEHNIGPAAKKNASEAGAALNQTEAELET...RVVTKVIREMCIQQYQEYRLA..
                     ..AGTRPRLAADAALAALLLL..ALAALR...........................................
                     ........................................................................
                     ........................................................................
                     ...............................................................
                     >123303164_:_Taeniopygia_guttata_:::_268_:::_???_:::_bird/1-268
                     ........................................................................
                     ........................................................................
                     ............................................MAKLPGTSCLLLLLLLLL.GADLASCKK
                     GKGKPGGGGWGT..........................GS...........RQPS............YPRQP
                     .........GY......PQNPGYPHNPGYPHN......PGYPHNPGYPHNPG.YPHNPGYP.........G.
                     WNQ.GYN........PSSGG.NYH.QKPWKAPKPKT......NLKHVAGAAAAG..................
                     ...AVVGGLGGYAMGRVMS...................GMQYRFDSPDEYRWWSENAARYPNQVYYRDYRGG
                     .AVPQDVFVADCFNITVTEHNIGPAAKKNASEAGAALNQTEAELET...RVVTKVIREMCIQQYQEYRLA..
                     ..AGTRPRLAADAALAALLLL..ALAALR...........................................
                     ........................................................................
                     ........................................................................
                     ...............................................................
                     >123303169_:_Taeniopygia_guttata_:::_274_:::_???_:::_bird/1-274
                     ........................................................................
                     ........................................................................
                     ............................................MAKLPGTSCLLLLLLLLL.GADLASCKK
                     GKGKPGGGGWGT..........................GS...........RQPS............YPRQP
                     .........GY......PQNPGYPHNPGYPHN......PGYPHNPGYPHNPG.YPHNPGYP...HNPGYPG.
                     WNQ.GYN........PSSGG.NYH.QKPWKAPKPKT......NLKHVAGAAAAG..................
                     ...AVVGGLGGYAMGRVMS...................GMQYRFDSPDEYRWWSENAARYPNQVYYRDYRGG
                     .AVPQDVFVADCFNITVTEHNIGPAAKKNASEAGAALNQTEAELET...RVVTKVIREMCIQQYQEYRLA..
                     ..AGTRPRLAADAALAALLLL..ALAALR...........................................
                     ........................................................................
                     ........................................................................
                     ...............................................................
                     >9050062_:_Anas_platyrhynchos_:::_272_:::_???_:::_bird/1-272
                     ........................................................................
                     ........................................................................
                     ............................................MARLLTTCCLLALLLAAC..TDVALSKK
                     GKGKPSGGGWGA..........................GSH..........RQPS............YPRQP
                     .........GYRHNPGYPHNPGYPHNPGYPHN......PGYPHNPGYP.......QNPGYP...HNPGYPG.
                     WGQ.GYN........PSSGG.SYHNQKPWKPPK..T......NFKHVAGAAAAG..................
                     ...AVVGGLGGYAMGRVMS...................GMSYRFDSPDEYRWWNENSARYPNRVYYRDY.SS
                     .PVSQDVFVADCFNITVTEYSIGPAAKKNTSEAVPAANQTDVETEN...KVVTKVIREVCVQQYREYRLA..
                     ..SGIQLH.PADTWLAVLLLL.TTLFAMH...........................................
                     ........................................................................
                     ........................................................................
                     ...............................................................
                     >123303260_:_Gasterosteus_aculeatus_:::_469_:::_???_:::_fish/1-469
                     ..MGKVGELVRVSLLIVF....LLNTESTWAKRG...SSSSSS.KKT...STSS.RGG..TQSKPSA.....
                     .......S....YPRQPQ.SPNRNPNP..YP.PGGSYP..........................G....A.G
                     .................................NPAGVPRQNP................PAAGYPVAGGYPA
                     AGGYPAAGGNPAAGRYPA............A.......GG............NPA.........AGGYPNQY
                     ..PGR...GNYPNQH..PPAGGYPAAGGYPAAGG......YPNQ..YPGRAG.NPGG........YP.....
                     .AG.GYP...A.GGYPAAGG......YPAAG........GYPVRGGNTG..WGQP....GA...GGYP.GGG
                     GGA........YPGGG..V...GGYP.......GAGVGGY.TNWNPNNKILSPRYGGGGYGGGGYGGQG...
                     ..MGGSPFSRSVQGMGYQP..KSSGFAKKAMLAAGVGAVAGMAVGYGLGRFPRPHFNFRNPEEEQYYNNYMY
                     KRYGTQSTDEKDYGRDYVYRP.PPR......................AESYDKFMERCMNRTDLLKDE....
                     ......GSSSTRPKSQ........................................................
                     ........DGVGQVADDTVSIEEIGYPALIEQMKARRCVEQFMVYSERFLQERKAEQQSQA...........
                     .NRSSPLSDGTIQLFT.........SF....................LMLLSSMLLLQ.....
                     >5690339_:_Vultur_gryphus_:::_209_:::_???_:::_bird/1-209
                     ........................................................................
                     ........................................................................
                     ......................................................................KK
                     GKGKPSGGGWGT..........................GSH..........RQPS............YPRQP
                     .........SY......PQNP......GYPHN......PGYPHNPGYPH.......NPGYP...HNPG....
                     WGQ.GYN........PSSGG.SYHNQKPWKPPKSKT......NFKHVAGAAAAG..................
                     ...AVVGGLGGYAMGRVMS...................GMHYRFDSPDEYRWWNENSARYPNQVYYRDY.SS
                     .PVSQDIFVADCFNITVTEYNIGPAAKKNTSEAGLAVNQTETELET...KVVTKVIREMCIQQYREYRL...
                     ........................................................................
                     ........................................................................
                     ........................................................................
                     ...............................................................
                     >5690341_:_Balearica_pavonina_:::_209_:::_???_:::_bird/1-209
                     ........................................................................
                     ........................................................................
                     ......................................................................KK
                     GKGKPSGGGWGT..........................GSH..........RQPS............YPRQP
                     .........GY......PQNP......GYPHN......PGYPHNPGYPH.......NPGYP...HNPG....
                     WGQ.GYN........PSSGG.SYHNQKPWKPPKSKT......NLKHVAGAAAAG..................
                     ...AVVGGLGGYAMGRVMS...................GMHYRFDSPDEYRWWNENSARYPNQVYYRDY.SS
                     .PVSQDVFVADCFNITVTEYNIGPAAKKNVSEAGAAVNQTETELET...KVVTKVIREMCIQQYREYRL...
                     ........................................................................
                     ........................................................................
                     ........................................................................
                     ...............................................................
                     >57116345_:_Lateolabrax_japonicus_:::_506_:::_???_:::_fish/1-506
                     ..MGRLCEVALVSLLIMF....LLNTESTWAKRG...SSSSSSSKKT...SSSSNKGG..TQSKPTS.....

                     .......SHPGNYPRQPQ.NPNRNPNP..YP.AGGSYP........................YPG....A.G
                     SNPNQYP..G.....................RVNPGGYPNQNP.......................AGGYPA
                     AGGYPAAGG......YPA............A.......GG............YPA.........AGGYPNQN
                     ..PGR...GNYPNQQ..QPAGGYPAAGGYP............NQ..NPGRAGTNQGG........YPNQYPA
                     .AG.GYP...AAGGYPAAGG......YPAAG........GYPNQ..RSP..YQYP....AG...GGYP.VRG
                     GNT...GQGWGQPGMN..P...GGYP.......GGAAGGH.PNWNPNNKILSPGFGGGGYG...YGGHG...
                     ..MGGSPFSRSVQSMGYQP..KSTGFAKKAVMAAGVGAVAGMAIGYGLGRFPRPHFNFRNPEEEQYYNNFMY
                     RRYGSQSTDEKDYGRDYVYKP.PPR......................AESYENFMGRCMNKTDLLKDQ....
                     ......GSSSPSLKGG........................................................
                     ........D...EDNDDTVGIEEIGYPALIEQLKSRPCVEQYMVYSERFLQERKAEQQLQP...........
                     .YNSSPQRYGVIQMFTPSSCYCPACSFSSENSWHSLHHYHNVFLLPPLYLHGHILLLYCILSP
                     >7271426_:_Trachemys_scripta_:::_270_:::_???_:::_reptile/1-270
                     ........................................................................
                     ........................................................................
                     ............................................MGRYRLTCWIVVLLVVMW..SDVSFSKK
                     GKGKGGGGG.NT..........................GSN..........RNPN............YPSNP
                     .........GY......PQNPGYPRNPSYPHNPAYPPNPAYPPNPGYPHNPS.YPRNPSYP...QNPGYPGG
                     GGQ.HYN........PAGGGTNFKNQKPWKPDKPKT......NMKAMAGAAAAG..................
                     ...AVVGGLGGYALGSAMS...................GMRMNFDRPEERQWWNENSNRYPNQVYYKEYNDR
                     .SVPEGRFVRDCLNNTVTEYKIDPNE...........NQNVTQVEV...RVMKQVIQEMCMQQYQQYQLA..
                     ..SGVKL.LSDPSLMLIIMLV..IFFVMH...........................................
                     ........................................................................
                     ........................................................................
                     ...............................................................
                     >5690349_:_Pachyptila_turtur_:::_215_:::_???_:::_bird/1-215
                     ........................................................................
                     ........................................................................
                     ......................................................................KK
                     GKGKPSGGGWGT..........................GSH..........RQPS............YPRQP
                     .........GY......PQNP......GYPHNPGYPHNPGYPHNPGYPH.......NPGYP...QNPG....
                     WGQ.GYN........PSSGG.TYHNQKPWKPPKSKT......NFKHVAGAAAAG..................
                     ...AVVGGLGGYAMGRVMS...................GMHYRFDSPDEYRWWNENSARYPNQVYYRDY.RS
                     .PVSQDVFVADCFNITVTEYNIGPAAKKNVSEAAPAANQTETELET...KVVTKVIREMCIQQYREYRL...
                     ........................................................................
                     ........................................................................
                     ........................................................................
                     ...............................................................
                     >5690347_:_Tyto_alba_:::_215_:::_???_:::_bird/1-215
                     ........................................................................
                     ........................................................................
                     ......................................................................KK
                     GKGKPSGGGWGT..........................GSH..........RQPS............YPRQP
                     .........GY......PQNPSYPHNPGYPHN......PGYPHNPGYPH.......NPGYP...HNPG....
                     WGQ.GYN........PSSGG.SYHNQKPWKPPKSKT......NFKHVAGAAAAG..................
                     ...AVVGGLGGYAMGRVMS...................GMHYRFDSPDEYQWWNENSARYPNRVYYRDY.SS
                     .PVTQDVFVADCFNITVTEYNIGPAAKKNTSEAGPAVNQTEMEMET...KVVTKVIREMCVQQYREYRL...
                     ........................................................................
                     ........................................................................
                     ........................................................................
                     ...............................................................
                     >5690343_:_Anas_platyrhynchos_:::_205_:::_???_:::_bird/1-205
                     ........................................................................
                     ........................................................................
                     ......................................................................KK
                     GKGKPSGGGWGT..........................GSH..........RQPS............YPRQP
                     .........GY......PQNP......GYPHN......PGYPHNPGYPH.......NPGYP...HNPG....
                     WG...YN........PSSGG.NYHHQKPWKPPK..T......NFKHVAGAAAAG..................
                     ...AVVGGLGGYAMGRVMS...................GMHYHFDSPDEYRWWNENSARYPNRVYYRDY.GS
                     .TVSQDVFVADCFNITVTEYNIGPAAKKNGSEAGPGANQTETEMET...KVVTKVIREMCVQQYREYRL...
                     ........................................................................
                     ........................................................................
                     ........................................................................
                     ...............................................................
                     >5690351_:_Pachyptila_desolata_:::_215_:::_???_:::_bird/1-215
                     ........................................................................
                     ........................................................................
                     ......................................................................KK
                     GKGKPSGGGWGT..........................GSH..........RQPS............YPRQP
                     .........GY......PQNP......GYPHNPGYPHNPGYPHNPGYPH.......NPGYP...QNPG....
                     WGQ.GYN........PSSGG.TYHNQKPWKPPKSKT......NFKHVAGAAAAG..................
                     ...AVVGGLGGYAIGRVMS...................GMHYRFDSPDEYRWWNENSARYPNQVYYPDY.RS
                     .PVSQDVFVADCFNITVTEYNIGPAAKKNVSEAAPAANQTETELET...KVVTKVIREMCIQQYREYRL...
                     ........................................................................
                     ........................................................................

                     ........................................................................
                     ...............................................................
                     >183985630_:_Xenopus_(Silurana)_tropicalis_:::_223_:::_???_:::_amphibian/1-223
                     ........................................................................
                     ........................................................................
                     ............................................MLRSLWTSLVLISLVCAL...TVSSKKS
                     GSGKSKTGGWNS..........................GS................................
                     .......................NRNPNYPGGYGW.....................NTG.....GNTG..GS
                     WGQ.PYN........PSGGN..NFNNKQWKPPKSKT......NMKAVAVGAAAG..................
                     .......AIGGYMLGNAMG...................RMSYHFSNPMEARYYNDYYNQMPERVYRPMYRGE
                     EHVSEDRFVTDCYNMSVTEYIIKPAE...........GKNTSEVNQLETRVKSQIIREMCITEYR.......
                     RGSGFKVL.SNPWLILTITLF..VYFVIE...........................................
                     ........................................................................
                     ........................................................................
                     ...............................................................
                     >189230180_:_Xenopus_(Silurana)_tropicalis_:::_224_:::_???_:::_amphibian/1-224
                     ........................................................................
                     ........................................................................
                     ...........................................MMLRSLWTSLVLISLVCAL...TVSSKKS
                     GSGKSKTGGWNS..........................GS................................
                     .......................NRNPNYPGGYGW.....................NTG.....GNTG..GS
                     WGQ.PYN........PSGGN..NFNNKQWKPPKSKT......NMKAVAVGAAAG..................
                     .......AIGGYMLGNAMG...................RMSYHFSNPMEARYYNDYYNQMPERVYRPMYRGE
                     EHVSEDRFVTDCYNMSVTEYIIKPAE...........GKNTSEVNQLETRVKSQIIREMCITEYR.......
                     RGSGFKVL.SNPWLILTITLF..VYFVIE...........................................
                     ........................................................................
                     ........................................................................
                     ...............................................................
                     >147899254_:_Xenopus_laevis_:::_235_:::_???_:::_amphibian/1-235
                     ........................................................................
                     ........................................................................
                     ............................................MPRSLWTCLVLISLVCTL...TVSSKKS
                     GSGKSKTGGWNN..........................GN...............................T
                     .........GNTGNT......GNNRNPNYPGGYGW.....................NTGNT...GNTG..GS
                     WGQQPYN........PSGGS..NFNNKQWKPPKSKT......NMKAVAVGAAAG..................
                     .......AIGGYMLGNAVG...................RMNHHFDNPMESRYYNDYYNQMPDRVYRPMYRSE
                     EYVSEDRFVTDCYNMSVTEYIIKPSE...........GKNGSDVNQLDTVVKSKIIREMCITEYR.......
                     RGSGFKVL.SNPWLILTITLF..VYFVIE...........................................
                     ........................................................................
                     ........................................................................
                     ...............................................................
                     >147907216_:_Xenopus_laevis_:::_216_:::_???_:::_amphibian/1-216
                     ........................................................................
                     ........................................................................
                     ............................................MPQSLWTCLVLISLICTL...TVSSKKS
                     GGGKSKTGGWNT..........................GS................................
                     .......................NRNPNYPGGY...........................P...GNTG..GS
                     WGQQPYN........PSG......YNKQWKPPKSKT......NMKSVAIGAAAG..................
                     .......AIGGYMLGNAVG...................RMSYQFNNPMESRYYNDYYNQMPNRVYRPMYRGE
                     EYVSEDRFVRDCYNMSVTEYIIKPTE...........GKNNSELNQLDTTVKSQIIREMCITEYR.......
                     RGSGFKVL.SNPWLILTITLF..VYFVIE...........................................
                     ........................................................................
                     ........................................................................
                     ...............................................................
                     >62739337_:_Xenopus_laevis_:::_216_:::_???_:::_amphibian/1-216
                     ........................................................................
                     ........................................................................
                     ............................................MPQSLWTCLVLISLVCTL...TVSSKKS
                     GGGKSKTGGWNT..........................GS................................
                     .......................NRNPNYPGGY...........................P...GNTG..GS
                     WGQQPYN........PSG......YNKQWKPPKSKT......NMKSVAIGAAAG..................
                     .......AIGGYMLGNAVG...................RMSYQFNNPMESRYYNDYYNQMPNRVYRPMYRGE
                     EYVSEDRFVRDCYNMSVTEYIIKPAE...........GKNNSELNQLDTTVKSQIIREMCITEYR.......
                     RGSGFKVL.SNPWLILTITLF..VYFVIE...........................................
                     ........................................................................
                     ........................................................................
                     ...............................................................
                     >57116343_:_Paralichthys_olivaceus_:::_497_:::_???_:::_fish/1-497
                     .MMGRLSEVAVVSLLVVF....LLSTESTWAKRG...SSS.SGKK.T...SSSSNRGG..TQTKPSS.....
                     .......SSPGSYPRQPQ.SPNRNPNP..YP.AGGSYP..................................
                     ...........HPGAG...............NTNPGGVPRQNP.............................
                     .GSYPGAGSYP..NQYPGRANPGGNPNQNPA.......GGYPAAGGYPAAGGYPA.........AGGYPAGG
                     GYPAG...GGYPNQN..PARN.YP..NQYPGAGGYPAAGGYPNQ..NPARN..YPNQ........YPG....
                     .AG.GYP...GAGGYP............AAG........GYPVRGGNIG..QGWG....VP...GGNP.GGY
                     P.....................GGYP.......GGYPGGY.PNWNPNNKILSPRFGGGGYGHGGYG......
                     ..MGGSPFSQSVQNMGYKP..QSTGFAKKAMVAAGVGAVAGMAVGYGLGRFPRPHFNFRNPEEEQHYNNYMY
                     RRYGSRSTDEKDFGRDYVYNP.PPR......................AQTYENFMSTCMNRTDLLKDQ....
                     ......GSSSST..TK........................................................
                     ........IG.SNEHNDTVSIEEIGYPALIKQMKSRRCVELYMVYSEQFLEERKAEQQSQP...........
                     .SRSDPLSYGVIQLCTSLFVLLSACSSSSEK......HFRIPFSIYPEWVSTLPVYFARL...
                     >55667998_:_Xenopus_laevis_:::_171_:::_???_:::_amphibian/1-171
                     ........................................................................
                     ........................................................................
                     .....................................................................KKS
                     GGGKSKTGGWNT..........................GS................................
                     .......................NRNPNYPGGY...........................P...GNTG..GS
                     WGQQPYN........PSG......YNKQWKPPKSKT......NMKSVAIGAAAG..................
                     .......AIGGYMLGNAVG...................RMSYQFNNPMESRYYNDYYNQMPNRVYRPMYRGE
                     EYVSEDRFVRDCYNMSVTEYIIKPAE...........GKNNSELNQLDTTVKSQIIREMCITEYR.......
                     RGS.....................................................................
                     ........................................................................
                     ........................................................................
                     ...............................................................
                     >1XU0_:_Xenopus_laevis_:::_130_:::_???_:::_amphibian/1-130
                     ........................................................................
                     ........................................................................
                     ........................................................................
                     ........................................................................
                     ........................................................................
                     ...............GSG......YNKQWKPPKSKT......NMKSVAIGAAAG..................
                     .......AIGGYMLGNAVG...................RMSYQFNNPMESRYYNDYYNQMPNRVYRPMYRGE
                     EYVSEDRFVRDCYNMSVTEYIIKPAE...........GKNNSELNQLDTTVKSQIIREMCITEYR.......
                     RGS.....................................................................
                     ........................................................................
                     ........................................................................
                     ...............................................................
                     >82780737_:_Sparus_aurata_:::_496_:::_???_:::_fish/1-496
              
                     .MMGRLCELALGSLLLVF....LLNTESTWAKKG...GSTGSGRKST...SSSSNRGG..TQSKPSS.....
                     .......T.............NRNTNP..YP.SGGSYP........................GAGNTNPG.G
                     GYPRQNP..GSYPGAG...............NSNPGGYPRQNP.............................
                     .GSYPGAGSNP..NQYPGRANPGGYPNQNPA.......GG............YPA.........AGGYPNQN
                     ..PAR...GNYPNQN..PAAGGYP..NQYPGRAG.TNQGGYPNQ..YPAGGG.YPNQ........YPG....
                     .AG.GYP...AAGGYPNQRS...PYQYPAAG........GYPVRGGNTG..WGQG....QA...GGYP.GGH
                     PYG...G......GGY..A...GGYP.......GGAAGGY.PNWNPNNKILSPGFGGGGYGHGGYGG.G...
                     ..MGGSPFSRSVQSMGYQP..KSSGFAKKAIMAAGVGAVAGMAVGYGLGRFPRPHFNFRNPEEEHYYNNYMY
                     RRYGTQSTDEKDYGRDYVYKL.PPR......................AETYDKFMSRCMNRTDLIKDQ....
       
                     ......GSSSTTPNNQ........................................................
                     ........GG.GDEDDDTVSIEEIGYPSLIEQLKARRCVGLYMEYSEKFLEERKAEQQSQP...GNRQQYLP
                     GNRCSPLSDGVIQLFTSLIMLLSSMLLLQ..................................
                     >123303281_:_Gasterosteus_aculeatus_:::_399_:::_???_:::_fish/1-399
                     ..MKPGSLSELCLLLLLCHTHLSLAKRGGG.....GFGK.................................
                     ........................................................................
                     ........................................................................
                     ................................GIGSKKSS............WSSR.........GSTSGN.
                     ........AGNRNN......AGSSSQGGYPKQPAQPNQGGYPPQSGRPGNP....G..GYP..QQPGG....
                     .............GYPN.........Q......YP......................ARGSPYGGGGYGGHG
                     GYG.AHGGYGGYGGG..YI.......................NQNPNNRVLSPQYGGS.FGYGGHAG.....
                     ..RGGSPFSHSVQSMGMRPSDRSRGFGRSAVMAAGGGALVGMALGYGLGRFPRPPFSFHNPQEEHYYNHYMY
                     RRYGAKSTDANDYSRDYRYSQ.VP........................QTYDSYMDSCMKRADLLPAGNPKP
                     VDTNNNPAATTT....TANASVVASAPN.....................NSLTPGPVTP......RPPNWPP
                     DSQVAAVADVEDDD...TVSIEEIGYPALIEQVKARRCLELYVVYAERYLVR.....PTDG..........A
                     QRPEA..LGFVAVVTSATLMLLNSNMLMLLR................................
                     >28466261_:_Takifugu_rubripes_:::_424_:::_???_:::_fish/1-424
                     ........................................................................
                     ........................................................................
                     .........MKLSLLSLLSLSLLLFHAHFSLGRKSGGTSGKGS................SS.NKSSSSNNEK
                     TKTSSNAGNRNN.........................QGFV.............SE.........SGSPKQQ
                     .GDNA........................PGGGGY.GHGGYGGG..FGGRGGHGYGV..YG....HPGY...
                     GGH.GYGVY....GHPGYGGHG....FHGRGGYKP............................GDGPY....
                     ..RGSYGG.....GYYDYG..................GRY.INQNPNNQILSPHYVNS.FGDGGRGG.....
                     ..RRGSAFYDKVKVMGRSPSHESKGFGHTAARAASGGAVAKMAVDYGLGRFPRPPFQFQSPEEEYYYNHYMY
                     RTYGVKSTDANDYSRDYFYSK.PLEN........................YERHMNTCMKNIELLPEENQ..
                     .......QKSNKPALYTPSS..PVLAPN..........NDTDNNTAADNSSTSTTPNHPNQPE.AKPPSPTA
                     QIPSESTA....DRDSDTVSIVEIGYPALIEQIKLRKCLERYMVYSEKYLEMRGGAQRLET...........
                     .....GSQMVLVGVTSTLLMLMNSSMLH...................................
       
                     >118344652_:_Takifugu_rubripes_:::_425_:::_???_:::_fish/1-425
                     ........................................................................
                     ........................................................................
                     ........MMKLSLLSLLSLSLLLFHAHFSLGRKSGGTSGKGS................SS.NKSSSSNNEK
                     TKTSSNAGNRNN.........................QGFV.............SE.........SGSPKQQ
                     .GDNA........................PGGGGY.GHGGYGGG..FGGRGGHGYGV..YG....HPGY...
                     GGH.GYGVY....GHPGYGGHG....FHGRGGYKP............................GDGPY....
                     ..RGSYGG.....GYYDYG..................GRY.INQNPNNQILSPHYVNS.FGDGGRGG.....
                     ..RRGSAFYDKVKVMGRSPSHESKGFGHTAARAASGGAVAKMAVDYGLGRFPRPPFQFQSPEEEYYYNHYMY
                     RTYGVKSTDANDYSRDYFYSK.PLEN........................YERHMNTCMKNIELLPEENQ..
                     .......QKSNKPALYTPSS..PVLAPN..........NDTDNNTAADNSSTSTTPNHPNQPE.AKPPSPTA
                     QIPSESTA....DRDSDTVSIVEIGYPALIEQIKLRKCLERYMVYSEKYLEMRGGAQRLET...........
                     .....GSQMVLVGVTSTLLMLMNSSMLH...................................
                     >123303288_:_Oryzias_latipes_:::_409_:::_???_:::_fish/1-409
                     ..MGRLCQLGLLSLLIIS....LLNMEPARAKRS...SSS...SKKSS...SSSNKGG..THSKPSS.....
                     .......SQPGNYPRQPQ.NPARNPNP..YP.PGGSYP........................HPGA......
                     ........................................................................
                     .......................................G............NPNP.........GGYPRQN
                     ...........PPNN..PGAGHYP..................NQ.........NPGG........YPA....
                     ..G.GYP...AAGGNP.AGG..YPNQYPGKG........GYPNQ.........YP....AG...GGYP.NQN
                     PGR...NYPNQYPGAGYPA...GGYPNQYPGRGGVNPGGY.PNWNPNNNVYNSRFGGGGYGQPGYG......
                     ..MGGSPFSRSVQGMGIQP..RSTGFAKKAMMAAGVGALAGMAVGYGLGRFPRPHFNFRNPEEESYYNNYMY
                     RRYGKESTDEKDYGRDYVYKI.PPR......................AESYEKFMARCMNETD....N....
                     ......GQASRSPAPV........................................................
                     ........SGVDTEEDDTVSIQEIGYPALIEQMKSRRCVEKYMIYSEQFLESR.SEQQSQA...G.......
                     ..RSSALSYGLFELFTSCFMLLSSMLLLQ..................................
                     >159792902_:_Poecilia_reticulata_:::_514_:::_???_:::_fish/1-514
                     ..MGRLLKIGLLSLIIMF....LLNFESTSAKRG...GSSSSSSSSSGKKSTTSNRGS.QTQSKPSN.....
                     .......SQPGNYPRQ.Q.SPNRNTNP..CP.SGGSYP........................YPGSKNTNPG
                     GHNRQNP..PSYPGAG................SNPNQYPGGNP.............................
                     AGGYP.AGGYP...NQPGRGN...YPNQNPA.......GG............YPAGGYPAGGYPAGGNPNQ.
                     ..PGR...GNYPNQN..P.AGGYPA.GGYP.AGG......YPNQ...PGRGN.YPNQ........NPA....
                     .AG.GYP...A.GGYPNQGRGGYPNQYPAGGNYPNQYPGGYPVRTGNTGPGWGPG....AA...GGYP.GGY
                     GGGYGGGYGGGYGGGY..G...GGYG.......GGAVGGY.PNWNPNNKILSPRFGGGGYGYGGHG......
                     ..MGGSPFSRSVQGMGIQP..KSTSFAKKAMVAAGVGALAGMAVGYGLGRFPRPHFTFRNPEEEYYYNNYMY
                     RRYGTKSTDEKDYGRDYVYKP.PPR......................AKTYENYMNECMDRTDVLKDQ....
                     ......GSSNS.............................................................
                     .........GATDEDNDTVSIEEIGYPALIDQVKSRRCVEEYMKYSAQFMEERKFEQQQQQ...QPRG....
                     ...SAPMSNGVVQLFTSGFMLLSSMLLLQ..................................
                     >185133946_:_Salmo_salar_:::_605_:::_???_:::_fish/1-605
                     ..MGKLCELALVSLALLA....LLHTDSTWAKRS...GSSSSSSKKTA....SSNRGSDKKPPKTSN.....
                     .......TQTGSYPRQPQ.SPNRNPNP..YP.AGGSYPGRGTNQNQNPAGGYPAAGGYPNQQYPGRAN..PG
                     GYPNQNPAAGGYPAAGGNPAAGGYPNQQYPGRANPGGYPNQNP......................AAGGYPA
                     AGGNPAAGGYPN.QQYPGRANPGGYPNQNPAAGGYPAAGG............NPV.........AGGYPNQQ
                     .YPGRANPGGYPNQN..PAAGGYPAAGGNPVAGG......YPNQ.QYPGRAN..PGG........YPNQNPA
                     .AG.GYP.................NQNPGRGGVNP....GYP..................A...GGHPAGGY
                     PVR.GGNTGWGQAGGY.........P......GGGTGGGYQPNWNPNNKILSPRYGGG.YGYGG....M...
                     ..GGGSPFSRSVQGMGQYPSTQSKGFAKKAFMAAGVGALAGMAVGYGLGRFPRPHFNFRNPQEEQSYNNYMY
                     SKYGERSTDENDYGRDYTYKV.PPR......................AESYDSFMDTCMKRNDLLQDQ....
                     ......GRDSQATPNNQKNNPQGANSQNMPI..................TPEMGNSSPASNQEGTDKVKPLT
                     PAPDEIAGEGKEEVDGPTVSIEEIGYPALVEQLKNRKCVELYINHSERFLEKQTAERSSSSSSNNNNNNKNV
                     NSRSNPLGQGLVQLITSLLMVLSSILLLH..................................
                     >185134650_:_Oncorhynchus_mykiss_:::_575_:::_???_:::_fish/1-575
                     ..MGKLCELALVSLVLLV....LLHTDSTWAKRS...GSSSS..KKTS....SSNRGSEKKPSKTSN.....
                     .......TQTGSYPRQPQ.SPNRNPNP..YP.AGGSYPGRGTNQNQNPAGGYPAAGGNPNQQYPGRGT....
                     .................................NQGGYPNQNP......................AAGGYPA
                     AGG......YPN.QQYPGRANPGGYPNQNPAAGGYPAAGG............YPA.........AGGYPNQQ
                     .YPGRANPGGYPNQN..PAAGGYPAAGGYPAAGG......YPNQ.QYPGRAN..PGG........YPNQNPA
                     .AG.GYP...AAGGYPAAGG..YPNQNPGRGGVNP....GYP..................A...GGYPAGGY
                     PVR.GGNTGWGQAGGH.........P......GGGMGGGYQPNWNPNNKILSPRYGGG.YGYGGGHGGM...
                     ..GGGSPFSRSVQGMGQYPSTQSKGFAKKAFMAAGVGAVAGMAIGYGLGRFPRPNVNFRNPQEEQSYNNYMY
                     KKYGERSTDENDYGRDYTYKV.PPR......................AESYDSFMDTCMKRNDLLQDQ....
                     ......GRDSQATPNNQKNNPQGANSQSMPI..................TPEVGNSSPASNQEGTDKVKPLT
                     PAPGEIAGEGKEEADGPTVSIEEIGYPALVEQLKNRKCVELYINHSERFLEKQTAERSSG...NNNNNNKNL
                     NSRSNPLGQGLLQLITSLLMVLSSTLLLH..................................
                     >123303272_:_Gasterosteus_aculeatus_:::_557_:::_???_:::_fish/1-557
                     ..MKLHVIHLLGLSLLLAHAYCTVAKRSGG.....LGGKISLFKKTPK..TNSPEKKSKGETIKQPKQQFNQ
                     GGHPQQPAQPGGYPNQGS.YPQQ.......PAQPGGYPNQGS.........YP..........QQPAQ..PG
                     GYPNQGSYPQQPAQPGGYP..............NQGSYPQQPA................QP...........
                     .GGYPNQGGHPN...............Q....GGYPNQGG............YPNQ.........GGYPNQ.
                     ........GGYPNQ......GGYPNQGGYPNQGSYPNQGGYPNQGGYH.NH....G..GYP..RQPSG....
                     .....YP...NQGGYPN.........QGVRPGGNP......................AQGSPYGGG......
                     .YG.GYGGNGGYPGG..YM.......................NYNPNNRVLSPHYGGS.FGYGGQGA.....
                     ..GGGSPFSHSVQSMGMRPSDRSRGFGRSAVMAAGGGALVGMALGYGLGRFPRPPFSFHNPQEEHYYNHYMY
                     RRYGAKSTDANDYSRDYRYSQ.LP........................QTYDSYMDSCMKRADLLPAGNPKP
                     VDTNNNPAATTTIKIATNSTSSVTNTTNFAVPDVSISSNTTKSNGTATGNSSTATTSSPLLLNKSEPVPVPR
                     DFQVLTKAATDDDDD..AVSIVEIGYPALIEQVKARRCVELYMVYAEKYLKKTTEPIPTGG..........V
                     QQLETGLRGLLAVLTSSVLMLLNCNMKLLH.................................
                     >47223680_:_Tetraodon_nigroviridis_:::_188_:::_???_:::_fish/1-188
                     ........................................................................
                     ........................................................................
                     ........................................................................
                     ........................................................................
                     ........................................................................
                     ........................................................................
                     ........................................................................
                     ..MGGSPFSQSVQAMGYKP..KSPSFAKKAMVAAGVGAVAGMAVGYGLGRFPRPHFGFRSPSEEYYYNNYMY
                     RQYGLKSTDERDYGRDYVYKL.PPR......................AESYEQFMDRCMNRTNLLKDQ....
                     ......GSSKA.............................................................
                     .............EDNDTVSIEEIGYPALIEQMKSRRCLEEYMAKSEKYLKQQ......QP...........
                     RNRCGPLSFGIIELFSSL.LFLSSTLLLQ..................................
                     >28459107_:_Takifugu_rubripes_:::_450_:::_???_:::_fish/1-450
                     ..MGRLCEVVLLSLLLLF....LLNTKATWAKKS...GSS..GGKKTG...SSTNWGS.RTPSKPSG.....
                     .......SQ...........PNRNSNP..YP.SGGSYP........................HPGT......
                     ...............G...............QSNPGGYPRQNP.............................
                     .ASNP.VGGSP..NQYPGRTNPGGYPNQNPA.......GG.....GYP..NQNPA.................
                     ....R...GNYPNQY..PAGGSNP..NQYPGRAG.TNQGGYPNQ..YPPAGG.YPGQGGYPAAGRYPGQ...
                     ..G.GYPQYPAAGGYPNQRS...PYQYPAAG........GYPVRTGNTGP..GWG....QP...GGHP.GGY
                     PGG............Y..P...GGYP.......GGAVGGY.TNWNPNNKILSPRFGGGGYMPG.........
                     ..MGGSPFSQSVQSMGYKP..KSPSFAKKAMVAAGVGAVAGMAVGYGLGRFPRPHFGFRSPSEEYYYNNYMY
                     HRYGTQSTDEKDYGRDYVYKP.PPR......................AESYENFMDRCMNRTDLLKDK....
                     ......G.................................................................
                     .........GKTDGDDDTVGIEEIGYPALVDQMKSRRCVEEYMAYSEQFLEK.......QA...R.......
                     .NRCGPLSFGAIQLFSSL.LLLSSTLLLQ..................................
                     >27263223_:_Takifugu_rubripes_:::_461_:::_???_:::_fish/1-461
                     .MMGRLCEVVLLSLLLLF....LLNTKATWAKKS...GSS..GGKKTG...SSTNWGS.RTPSKPSG.....
                     .......SQ...........PNRNSNP..YP.SGGSYP........................QPGT......
                     ...............G...............QSNPGGYPRQNP.............................
                     .ASNP.VGGSP..NQYPGRTNPGGYPNQNPA.......GG.....GYP..NQNPAG.........GGYPNQN
                     ..PAR...GNYPNQY..PAGGSNP..NQYPGRAG.TNQGGYPNQ..YPPAGG.YPGQGGYPAAGRYPGQ...
                     ..G.GYPQYPAAGGYPNQRS...PYQYPAAG........GYPVRTGNTGP..GWG....QP...GGHP.GGY
                     PGG............Y..P...GGYP.......GGAVGGY.TNWNPNNKILSPRFGGGGYMPG.........

                     ..MGGSPFSQSVQSMGYKP..KSPSFAKKAMVAAGVGAVAGMAVGYGLGRFPRPHFGFRSPSEEYYYNNYMY
                     HRYGTQSTDEKDYGRDYVYKP.PPR......................AESYENFMDRCMNRTDLLKDK....
                     ......G.................................................................
                     .........GKTDGDDDTVGIEEIGYPALVDQMKSRRCVEEYMAYSEQFLEK.......QA...R.......
                     .NRCGPLSFGAIQLFSSL.LLLSSTLLLQ..................................
                     >78370152_:_Danio_rerio_:::_606_:::_???_:::_fish/1-606
                     ..MGELCKLLAIVLVLMA....VLHYTSGGKKG..TVSKTVPKKPPEK..TSQGTKTQPNYPRQPSNPGAGS
                     NPGYPNQQYPGRGGSSPSGYPNQNPGAGSYP.AGGSYPYPGR......................GGSS..PG
                     GYPNQNPGAGSYPSGGSYP..............SAGGNPNQYP................GR...........
                     .GGY.NPGGYPN...............QNPGAGSYPAGGS............YPSA.........GGNPNQY
                     PGRGGTSPAGYP........NQNPGAGSYPAGGSYPSAGGNPN..QYPGRGGSNPG..GYP..NQNPG....
                     .AG.SYP...AGGSYPSAGGN..PNQYPGRGGSSP...GGNPNQNPGAGTYAGGGYPNQYP..GGGGYSNQN
                     PGR.SGYSPGGYPGAGSYPVRNAGQPGVYPGAHPSAGGGY.PNWNPNNQILSPRYGGP.FGGGGFGT.....
                     ..GG.SPFSQSVKNMGYNPSAKSKGFGKKAVVAAGVGAMAGMAIGYGIGNFQRPNFQFRSPQEERYYNNHMY
                     QRQDTRFKDGGNKKKPSHTAG.TDNTSKLPAQA...............QSYDNFMKTCMKRNNLLRDQ....
                     .......................DSKESAGNSNIQRDEPMSDFPGLNEESSQKGGPEKNDTTSNTTTRDYP.
                     .....KAADIHKNEDEETVSIMQIGYPALIEQMKSRKCVELYIVYSESQRDDRMEKREGKI..........P
                     RSSNNHNGH.....SISEVLLLLTASTMLFST...T...........................
                     >57753651_:_Danio_rerio_:::_606_:::_???_:::_fish/1-606
                     ..MGELCKLLAIVLVLMA....VLHYTSGGKKG..TVSETVPKKPPEK..TSQGTKTQPNYPRQPSNPGAGS
                     NPGYPNQQYPGRGGSSPSGYPNQNPGAGSYP.AGGSYPYPGR......................GGSS..PG
                     GYPNQNPGAGSYPSGGSYP..............SAGGNPNQYP................GR...........
                     .GGY.NPGGYPN...............QNPGAGSYPAGGS............YPSA.........GGNPNQY
                     PGRGGTSPAGYP........NQNPGAGSYPAGGSYPSAGGNPN..QYPGRGGSNPG..GYP..NQNPG....
                     .AG.SYP...AGGSYPSAGGN..PNQYPGRGGSSP...GGNPNQNPGAGTYAGGGYPNQYP..GGGGYSNQN
                     PGR.SGYSPGGYPGAGSYPVRNAGQPGVYPGAHPSAGGGY.PNWNPNNQILSPRYGGS.FGGGGFGT.....
                     ..GG.SPFSQSVKNMGYNPSAKSKGFGKKAVVAAGVGAMAGMAIGYGIGNFQRPNFQFRSPQEERYYNNHMY
                     QRQDTRFKDGGNKKKPSHTAG.TDNTSKLPAQA...............QSYDNFMKTCMKRNNLLRDQ....
                     .......................DSKESAGNSNIQRDEPMSDFPGLNEESSQKGGPEKNDTTSNTTTRDYP.
                     .....KAADIHKNEDEETVSIMQIGYPALIEQMKSRKCVELYIVYSESQRDDRMEKREGKI..........P
                     RSSNNHNGH.....SISEVLLLLTASTMLFST...T...........................
                     >79151779_:_Danio_rerio_:::_606_:::_???_:::_fish/1-606
                     ..MGELCKLLAIVLVLMA....VLHYTSGGKKG..TVSETVPKKPPEK..TSQGTKTQPNYPRQPSNPGAGS
                     NPGYPNQQYPGRGGSSPSGYPNQNPGAGSYP.AGGSYPYPGR......................GGSS..PG
                     GYPNQNPGAGSYPSGGSYP..............SAGGNPNQYP................GR...........
                     .GGY.NPGGYPN...............QNPGAGFYPAGGS............YPSA.........GGNPNQY
                     PGRGGTSPAGYP........NQNPGAGSYPAGGSYPSAGGNPN..QYPGRGGSNPG..GYP..NQNPG....
                     .AG.SYP...AGGSYPSAGGN..PNQYPGRGGSSP...GGNPNQNPGAGTYAGGGYPNQYP..GGGGYSNQN
                     PGR.SGFSPGGYPGAGSYPVRNAGQPGVYPGAHPSAGGGY.PNWNPNNQILSPRYGGS.FGGGGFGT.....
                     ..GG.SPFSQSVKNMGYGPSAKSKGFGKKAVVAAGVGAMAGMAIGYGIGNFQRPNFQFRSPQEERYYNNHMY
                     QRQDTRFKDGGNKKKPSHTAG.TDNTSKLPAQA...............QSYDNFMKTCMKRNNLLRDQ....
                     .......................DSKESAGNSNIQREEPMRDFPGLNEESSQKGGPEKNDTTSNTTTRDYP.
                     .....KAAEIHKNEDEETVSIMQIGYPALIEQMKSRKCVELYIVYSESQRDDRMEKREGKI..........P
                     KSSNNHNGH.....SIYEVLLLLTASTMLFST...T...........................
                     >63146674_:_Danio_rerio_:::_606_:::_???_:::_fish/1-606
                     ..MGELCKLLAIVLVLMA....VLHYTSGGKKG..TVSKTVPKKPPEK..TSQGTKTQPNYPRQPSNPGAGS
                     NPGYPNQQYPGRGGSSPSGYPNQNPGAGSYP.AGGSYPYPGR......................GGSS..PG
                     GYPNQNPGAGSYPSGGSYP..............SAGGNPNQYP................GR...........
                     .GGY.NPGGYPN...............QNPGAGSYPAGGS............YPSA.........GGNPNQY
                     PGRGGTSPAGYP........NQNPGAGSYPAGGSYPSAGGNPN..QYPGRGGSNPG..GYP..NQNPG....
                     .AG.SYP...AGGSYPSAGGN..PNQYPGRGGSSP...GGNPNQNPGAGTYAGGGYPNQYP..GGGGYSNQN
                     PGR.SGYSPGGYPGAGSYPVRNAGQPGVYPGAHPSAGGGY.PNWNPNNQILSPRYGGS.FGGGGFGT.....
                     ..GG.SPFSQSVKNMGYNPSAKSKGFGKKAVVAAGVGAMAGMAIGYGIGNFQRPNFQFRSPQEERYYNNHMY
                     QRQDTRFKDGGNKKKPSHTAG.TDNTSKLPAQA...............QSYDNFMKTCMKRNNLLRDQ....
                     .......................DSKESAGNSNIQREEPMRDFPGLNEESSQKGGPEKNDTTSNTTTRDYP.
                     .....KAADIHKNEDEETVSIMQIGYPALIEQMKSRKCVELYIVYSESQRDDRMEKREGKI..........P
                     RSSNNHNGH.....SISEVLLLLTASTMLFST...T...........................
                     >34595971_:_Cyprinus_carpio_:::_529_:::_???_:::_fish/1-529
                     ..MGRLTVLLLCLALVVS....VVARRGGGGKGGFSWGKSGGSSYKGG..SSTGSRSGSSSSN......KGT
                     SSRGTH.SSPGNYPRQPQ.VPNQNPPP..YPGTGGGYPGQGR.........YP..........PAGSN..PG
                     .Q......................................................................
                     ..GYPNQGSYPG...............R....GGYPAQGG............YPAQ.........GGYPAQ.
                     ........GGYP.Q......GNYPGRSGYPG............GGSYPGGG.......SYP..NRNPGQAGG
                     YGH.PYP...AGGSYPG.........YPVRGGSSP......................NQ...FGGGVVG...
                     ......AGAGGYPAAAQYP.......................YWNPNNKIMSPGYGGN...YGSYGY.....
                     ..GGRSPFAQSVHNMGMAPSHKSKGFGKQAILAAGAGAVGGMALGYGLGRFPRPHFHFHSPQEEYYYNHYMY
                     RRYGQPPPDGNMNRHSNSQGG.NPGNAGSTSAGQGNVNPHDIFQNPPPQSYDSFMETCVKRTDLLRE.....
                     ...KPEGTSRRSTDVVEVQEAEVANDPI......GTQENATSNNSTAERDTSGSSF..FVTSKPPKTPSQPQ
                     KNTHERKAEADGDED.DTVSIMEIGYPALIEQMKARRCVELYMVSVEQHAEKQLQ.YRSNI..........D
                     DKTSNGSGDLPGPFGHGVMLLFTSILSLIFIS...LLH.........................
                     >82583703_:_Tetraodon_nigroviridis_:::_337_:::_???_:::_fish/1-337
                     ........................................................................
                     ........................................................................
                     ........................................................................
                     .....................................QGSV.............SV.........GEFPKQH
                     .GPLG........................QGGSSP.GGGGYG..........................Y...
                     GGH.RHRTY....G...............RGGYGP............................YDG......
                     ...GSDVG.....GFGSYG..................VGD.INQN...RILSPHYGNS.LGYGGRGG.....
                     ..RGGSPFYQKVKAVGISPSDKSRGFGRTAVMAASGGVVAKMAVDYGLGRVPHRQFQFQSPEEEYYYNYYMY
                     TIYGVKSTDANDYSRDYAYSQ.PLED........................YERHMNTCMKMVELLPEDDQ..
                     .......QISNKPALNVSTSVLSVLSVS..........NDTDNKTAADNSSSSPAPNHPGKTE.AKPVSPTS
                     QIPSGAAATAALDRDDDTVSIVEIGYPALIRMMKVRKCLKIYIVNSEKYLKVIGGAQRLET...........
                     .....GRQMVVAVIPSALLMLMNSNMLQ...................................
                     >159155254_:_Danio_rerio_:::_490_:::_???_:::_fish/1-490
                     ..MGRLTILLLCLALVVS....VVAKRGGGSKGGFGWGKTSSSSNKGG..SSSGNKGGSSSSSSSSSSSKGT
       
                     SSHGTH.SSPGNYPRQPQ.VPNQNPPP..YPGAGGGYPGQ................................
                     ........................................................................
              
                     ......................................GR............YPPA.........GSNP...
                     .......................................GYPGGASYPGAGA...G..SYP..NRYPG....
                     .GN.PYP...VGGSYPG.........YPVRGGSSP......................NQ...FGGGV.....
                     ......GGAGGYPGAAQYP.......................NWNPNNKIMSPAYGGN...YGGYGY.....
                     ..GGRSPFAQSVQGMGMAPSYKSKGFGKQAIIAAGAGAVAGMALGYGLGSFPRPRFHFHNPQEEYYYNHYMY
                     RRYGQTPPDGNMNGNTNSQGG.IPGDAGSASAGQGNLNPHEIFQNPPPQSYDKFMDTCMKRTDLLRE.....
                     ...KSEGRSRRSPDLFEPQAAEVDNDPS......EMQENVTNNNSTSERTNSAASTDDSVTTNPPETPSQPQ
                     KQTQERAAEANDDNDGDTVSIMEIGYPMLIEQMKARRCVELYMVYAEQHAEKQAQ.AQAKM..........A
                     DEARNGSGNLPGPISHGGMLLITSILSLIFSS...LLH.........................
                     >62122745_:_Danio_rerio_:::_390_:::_???_:::_fish/1-390
                     ........................................................................
                     ........................................................................
                     ........................................................................
                     .................................GYPGQGG............YP..................
                     ....................................AQGGYPGGASYPGAG.......SYP..NRYPG....
                     .GN.PYP...VGGSYPG.........YPVRGGSSP......................NQ...FGGGV.....
                     ......GGAGGYPGAAQYP.......................NWNPNNKIMSPAYGGN...YGGYGY.....
                     ..GGRSPFAQSVQGMGMAPSYKSKGFGKQAIIAAGAGAVAGMALGYGLGSFPRPRFHFHNPQEEYYYNHYMY
                     RRYGQTPPDGNMNGNTNSQGG.IPGDAGSASAGQGNLNPHEIFQNPPPQSYDKFMDTCMKRTDLLRE.....
                     ...KSEGRSRRSPDLFEPQAAEVDSDQS......EMQENVTNNNSTSERTNSAASTDDSVTTNPPETPSQPQ
                     KQTQERAAEANDDNDGDTVSIMEIGYPMLIEQMKARRCVELYMVYAEQHAEKQAQ.AQAKM..........A
                     DEARNGSGNLPGPISHGGMLLITSILSLIFSS...LLH.........................
                     >5690345_:_Struthio_camelus_:::_122_:::_???_:::_bird/1-122
                     ........................................................................
                     ........................................................................
                     ........................................................................
                     ........................................................................
                     .......................PHNPGYPHN......PGYPHNPGYPH.......NPGYP...HNPG....
                     WGQ.GYN........PSSGG.SYHNQKPWKPPKSKT......NFKHVAGAAAAG..................
                     ...AVVGGLGGYVMGRAMS...................GMHYHFDSPDEYRWWNENAGRYPNRVYYRDY.SS
                     .PVTQDM.................................................................
                     ........................................................................
                     ........................................................................
                     ........................................................................
                     ...............................................................
                     >41327317_:_Danio_rerio_:::_567_:::_???_:::_fish/1-567
                     ..MGRLTILLLCLALVVS....VVAKRGSGSKGGFGWGKTSSSSNKGG..SSSGNKGGSSSSSSSSSSSKGT
                     SSHGTH.SSPGNYPRQPQ.VPNQNPPP..YPGAGGGYPGQGR.........YP..........PAGSN..PG
                     .YPNQGSYPGR....AGYP..............NQGGYPAQ...............................
                     .GGYPAQGGYPA...............Q....GGYPAQGG............YPAQ.........GGYPAQ.
                     ........GGYP.Q......GNYPGRSGYPGQGGYPAQGGYPGGASYPGAGA...G..SYP..NRYHG....
                     .GN.PYP...VGGSYPG.........YPVRGGSSP......................NQ...FGGGV.....
                     ......GGAGGYPGAAQYP.......................NWNPNNKIMSPAYGGN...YGGYGY.....
                     ..GGRSPFAQSVQGMGMAPSYKSKGFGKQAIIAAGAGAVAGMALGYGLGSFPRPRFHFHNPQEEYYYNHYMY
                     RRYGQTPPDGNMNGNTNSQGG.IPGDAGSASAGQGNLNPHEIFQNPPPQSYDKFMDTCMKRTDLLRE.....
                     ...KSEGRSRRSPDLFEPQAAEVDSDQS......EMQENVTNNNSTSERTNSAASTDDSGTTNPPETPSQPQ
                     KQTQERAAEANDDNDGDTVSIMEIGYPMLIEQTKARRCDELHMVHAEQHAEKQAQ.AQVKM..........A
                     DEARNGSGNVPGPISHGGMLLINSILSLMFSS...LLH.........................
                     >38641282_:_Danio_rerio_:::_561_:::_???_:::_fish/1-561
                     MQMGRLTILLLCLALVVS....VVAKRGSGSKGGFGWGKTSSSSNKGG..SSSGNKGGSSSSSSSSSSSKGT
                     SSHGTH.SSPGNYPRQPQ.VPNQNPPP..YPGAGGGYPGQGR.........YP..........PAGSN..PG
                     .YPNQGSYPGR....AGYP..............NQGGYPAQ...............................
                     .GGYPAQGGYPA...............Q....GGYPAQGG............YP...............AQ.
                     ........GGYP.Q......GNYPGRSGYPGQGGYPAQGGYPGGASYPGAG.......SYP..NRYPG....
                     .GN.PYP...VGGSYPG.........YPVRGGSSP......................NQ...FGGGV.....
                     ......GGAGGYPGAAQYP.......................NWNPNNKIMSPAYGGN...YGGYGY.....
                     ..GGRSPFAQSVQGMGMAPSYKSKGFGKQAIIAAGAGAVAGMALGYGLGSFPRPRFHFHNPQEEYYYNHYMY
                     RRYGQTPPDGNMNGNTNSQGG.IPGDAGSASAGQGNLNPHEIFQNPPPQSYDKFMDTCMKRTDLLRE.....
                     ...KSEGRSRRSPDLFEPQAAEVDSDQS......EMQENVTNNNSTSERTNSAASTDDSVTTNPPETPSQPQ
                     KQTQERAAEANDDNDGDTVSIMEIGYPMLIEQMKARRCVELYMVYAEQHAEKQAQ.AQAKM..........A
                     DEARNGSGNLPGPISHGGMLLITSILSLIFSS...LLH.........................
                     >63146672_:_Danio_rerio_:::_567_:::_???_:::_fish/1-567
                     ..MGRLTILLLCLALVVS....VVAKRGGGSKGGFGWGKTSSSSNKGG..SSSGNKGGSSSSSSSSSSSKGT
                     SSHGTH.SSPGNYPRQPQ.VPNQNPPP..YPGAGGGYPGQGR.........YP..........PAGSN..PG
                     .YPNQGSYPGR....AGYP..............NQGGYPAQ...............................
                     .GGYPAQGGYPA...............Q....GGYPAQGG............YPAQ.........GGYPAQ.
                     ........GGYP.Q......GNYPGRSGYPGQGGYPAQGGYPGGASYPGAGA...G..SYP..NRYPG....
                     .GN.PYP...VGGSYPG.........YPVRGGSSP......................NQ...FGGGV.....
                     ......GGAGGYPGAAQYP.......................NWNPNNKIMSPAYGGN...YGGYGY.....
                     ..GGRSPFAQSVQGMGMAPSYKSKGFGKQAIIAAGAGAVAGMALGYGLGSFPRPRFHFHNPQEEYYYNHYMY
                     RRYGQTPPDGNMNGNTNSQGG.IPGDAGSASAGQGNLNPHEIFQNPPPQSYDKFMDTCMKRTDLLRE.....
                     ...KSEGRSRRSPDLFEPQAAEVDNDPS......EMQENVTNNNSTSERTNSAASTDDSVTTNPPETPSQPQ
                     KQTQERAAEANDDDDGDTVSIMEIGYPMLIEQMKARRCVELYMVYAEQHAEKQAQ.AQAKM..........A
                     DEARNGSGNLPGPISHGGMLLITSILSLIFSS...LLH.........................
                     >190337581_:_Danio_rerio_:::_567_:::_???_:::_fish/1-567
                     ..MGRLTILLLCLALVVS....VVAKRGGGSKGGFGWGKTSSSSNKGG..SSSGNKGGSSSSSSSSSSSKGT
                     SSHGTH.SSPGNYPRQPQ.VPNQNPPP..YPGAGGGYPGQGR.........YP..........PAGSN..PG
                     .YPNQGSYPGR....AGYP..............NQGGYPAQ...............................
                     .GGYPAQGGYPA...............Q....GGYPAQGG............YPVQ.........GGYPAQ.
                     ........GGYP.Q......GNYPGRSGYPGQGGYPAQGGYPGGASYPGAGA...G..SYP..NRYPG....
                     .GN.PYP...VGGSYPG.........YPVRGGSSP......................NQ...FGGGV.....
                     ......GGAGGYPGAAQYP.......................NWNPNNKIMSPAYGGN...YGGYGY.....
                     ..GGRSPFAQSVQGMGMAPSYKSKGFGKQAIIAAGAGAVAGMALGYGLGSFPRPRFHFHNPQEEYYYNHYMY
                     RRYGQTPPDGNMNGNTNSQGG.IPGDAGSASAGQGNLNPHEIFQNPPPQSYDKFMDTCMKRTDLLRE.....
                     ...KSEGRSRRSPDLFEPQAAEVDNDPS......EMQENVTNNNSTSERTNSAASTDDSVTTNPPETPSQPQ
                     KQTQERAAEANDDNDGDTVSIMEIGYPMLIEQMKARRCVELYMVYAEQHAEKQAQ.AQAKM..........A
                     DEARNGSGNLPGPISHGGMLLITSILSLIFSS...LLH.........................
                     >61651806_:_Danio_rerio_:::_567_:::_???_:::_fish/1-567
                     ..MGRLTILLLCLALVVS....VGAKRGGGSKGGFGWGKTSSSSNKGG..SSSGNKGGSSSSSSSSSSSKGT
                     SSHGTH.TSPGNYPRQPQ.VPNQNPPP..YPGAGGGYPGQGR.........YP..........PAGSN..PG
                     .YPNQGSYPGR....AGYP..............NQGGYPAQ...............................
                     .GGYPAQGGYPA...............Q....GGYPAQGG............YPAQ.........GGYPAQ.
                     ........GGYP.Q......GNYPGRSGYPGQGGYPAQGGYPGGASYPGAGA...G..SYP..NRYPG....
                     .GN.PYP...VGGSYPG.........YPVRGGSSP......................NQ...FGGGV.....
                     ......GGAGGYPGAAQYP.......................NWNPNNKIMSPAYGGN...YGGYGY.....
                     ..GGRSPFAQSVQGMGMAPSYKSKGFGKQAIIAAGAGAVAGMALGYGLGSFPRPRFHFHNPQEEYYYNHYMY
                     RRYGQTPPDGNMNGNTNSQGG.IPGDAGSASAGQGNLNPHEIFQNPPPQSYDKFMDTCMKRTDLLRE.....
                     ...KSEGRSRRSPDLFEPQAAEVDNDPS......EMQENVTNNNSTSERTNSAASTDDSVTTNPPETPSQPQ
                     KQTQERAAEANDDNDGDTVSIMEIGYPMLIEQMKARRCVELYMVYAEQHAEKQAQ.AQAKM..........A
                     DEARNGSGNLPGPISHGGMLLITSILSLIFSS...LLH.........................
                     >79160040_:_Danio_rerio_:::_481_:::_???_:::_fish/1-481
                     ..MGRLTILLLCLALVVS....VVAKRGSGSKGGFGWGKTSSSSNKGG..SSSGNKGGSSSSSSSSSSSKGT
                     SSHGTH.SSPGNYPRQPQ.VPNQNPPP..YPGAGGGYPGQGR.........YP..........PAGSN..PG
                     .YPSQGSYPGR....AGYP..............NQGGYPAQ...............................
                     .GGYPAQGGYPA...............Q....GGYPAQGG............YPAQ.........GGYP...
                     .............Q......GNYPGRSGYPGQGGYPAQGGYPGGASYPGAG.......SYP..NRYPG....
                     .GN.PYP...VGGSYPG.........YPVRGGSSP......................NQ...FGGGV.....
                     ......GGAGGYPGAAQYP.......................NWNPNNKIMSPAYGGN...YGGYGY.....
                     ..GGRSPFAQSVQGMGMAPSYKSKGFGKQAIIAAGAGAVAGMALGYGLGSFPRPRFHFHNPQEEYYYNHYMY
                     RRYGQTPPDGNMNGNTNSQGG.IPGDAGSASAGQGNLNPHEIFQNPPPQSYDKFMDTCMKRTDLLRE.....
                     ...KSEGRSRRSPDLFEPQAAEVDSDQS......EMQENVTNNNSTSERTNSAASTDDSVTTNPPETPSQPQ
                     KQTQERAAET..............................................VVATF..........Q
                     DP.............................................................
                     
                     
